# Supplementary material for: Northern Hemisphere stratospheric temperature response to external forcing in decadal climate simulations
Source: Copernicus journal article supplement (doi:10.5194/acp-26-647-2026), 2026-01-14
Supplement: Supplementary file 1 [file acp-26-647-2026-supplement.pdf]

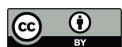

*Supplement of*

## **Northern Hemisphere stratospheric temperature response to external forcing in decadal climate simulations**

**Abdullah A. Fahad et al.**

*Correspondence to:* Abdullah A. Fahad ([a.fahad@nasa.gov](mailto:a.fahad@nasa.gov))

The copyright of individual parts of the supplement might differ from the article licence.

Supplementary information

Table S1. CMIP6 Model List

| Model Name      | Model Name         | Model Name         |
|-----------------|--------------------|--------------------|
| 1 AWI-CM-1-1-MR | 10 EC-Earth3-Veg   | 19 CESM2-FV2       |
| 2 BCC-CSM2-MR   | 11 IPSL-CM6A-LR    | 20 CESM2-WACCM     |
| 3 BCC-ESM1      | 12 MIROC-ES2L      | 21 CESM2-WACCM-FV2 |
| 4 CAMS-CSM1-0   | 13 MIROC6          | 22 NorESM2-LM      |
| 5 FGOALS-g3     | 14 HadGEM3-GC31-LL | 23 GFDL-CM4        |
| 6 CanESM5       | 15 UKESM1-0-LL     | 24 GFDL-ESM4       |
| 7 CNRM-CM6-1    | 16 MRI-ESM2-0      | 25 NESM3           |
| 8 CNRM-ESM2-1   | 17 GISS-E2-1-G     | 26 SAM0-UNICON     |
| 9 E3SM-1-0      | 18 GISS-E2-1-H     | 27 MCM-UA-1-0      |

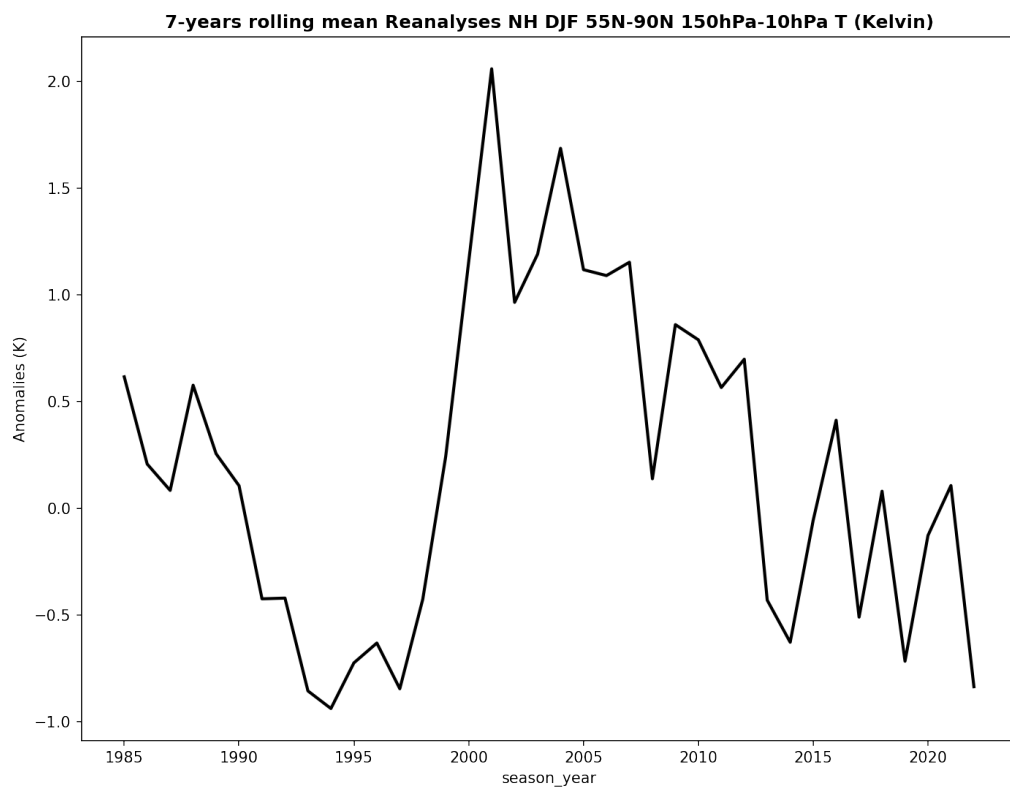

**Figure S1.** Rolling mean T from reanalysis

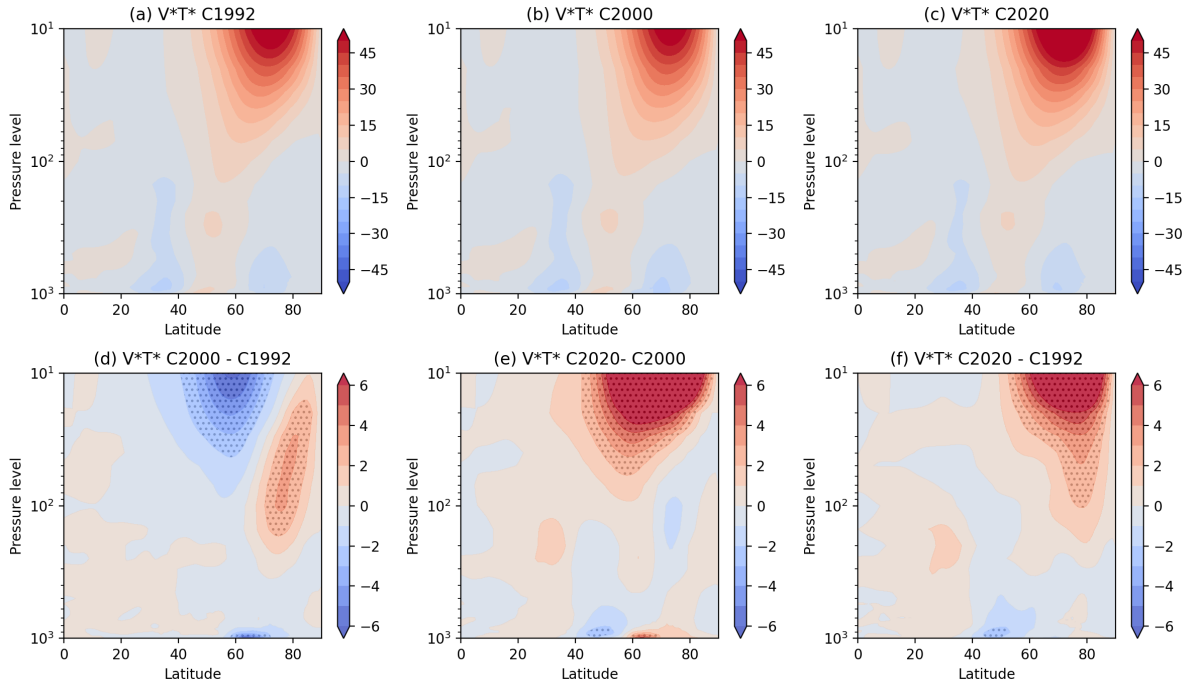

**Figure S2.** Zonal Mean NH DJF  $V^*T^*$  mean for (a) P1992, (b) P2000, (c) P2020, and (d) difference between P2000 - P1992, (e) difference between P2020 - P2000, (f) difference between P2020 - P1992. Figures are stippled at 95% significance computed using a difference of means 2-sided t-test from 30-member ensemble sample.

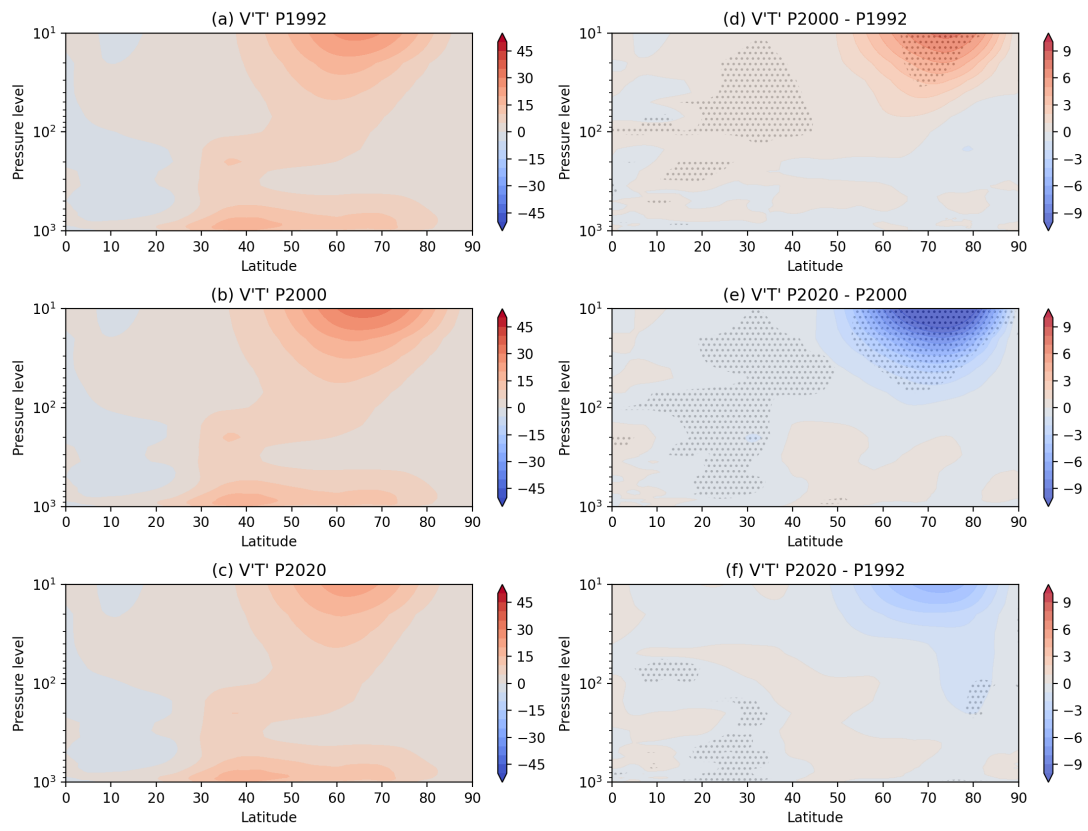

**Figure S3.** Zonal Mean NH DJF  $V'T'$  mean for (a) P1992, (b) P2000, (c) P2020, and (d) difference between P2000 - P1992, (e) difference between P2020 - P2000, (f) difference between P2020 - P1992. Figures are stippled at 95% significance computed using a difference of means 2-sided t-test from 30-member ensemble sample.

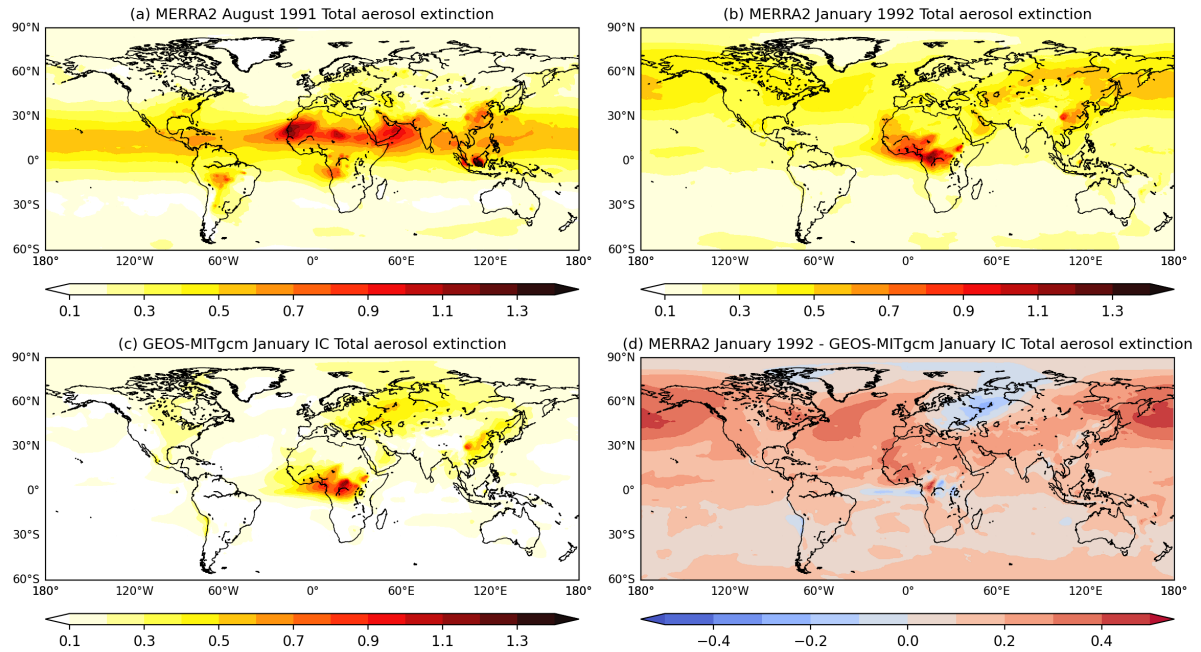

**Figure S4.** Total monthly mean aerosol extinction Aerosol Optical Depth [550 nm] for (a) MERRA2 August 1991, (b) MERRA2 January 1992, (c) GEOS-MITgcm January initial condition, which is used or more spun-up from this initial condition was used to initialize all experiments, and (d) MERRA2 January 1992 - GEOS-MITgcm January initial condition. The volcanic aerosol from Mount Pinatubo is visible in the MERRA2 August 1991 aerosol extinction in plot (a) (15°N, 120°E). The GEOS-MITgcm January initial condition is significantly different from observed state compared to the MERRA2 shown in plot (d), where any volcanic aerosol is not present.
